1 **Regions of very low H3K27me3 partition the *Drosophila* genome into**  
2 **topological domains**

3

4 Sherif El-Sharnouby<sup>1\*</sup>, Bettina Fischer<sup>2,3\*</sup>, Jose Paolo Magbanua<sup>1\*</sup>, Benjamin  
5 Umans<sup>1</sup>, Rosalyn Flower<sup>1</sup>, Siew Woh Choo<sup>4</sup>, Steven Russell<sup>2,3</sup>, Robert White<sup>1</sup>

6 \* contributed equally

7

8 <sup>1</sup>Department of Physiology, Development and Neuroscience, University of  
9 Cambridge, CB2 3DY United Kingdom, <sup>2</sup>Department of Genetics, University of  
10 Cambridge, CB2 3EH United Kingdom, <sup>3</sup>Cambridge Systems Biology Centre,  
11 University of Cambridge, Tennis Court Road, Cambridge, CB2 1QR United  
12 Kingdom, <sup>4</sup>Department of Oral and Craniofacial Sciences, Faculty of  
13 Dentistry, University of Malaya, 50603 Kuala Lumpur, Malaysia

14

|    |                     |                                                                             |
|----|---------------------|-----------------------------------------------------------------------------|
| 15 | Sherif El-Sharnouby | <a href="mailto:se266@cam.ac.uk">se266@cam.ac.uk</a>                        |
| 16 | Bettina Fischer     | <a href="mailto:bef22@cam.ac.uk">bef22@cam.ac.uk</a>                        |
| 17 | Jose Paolo Magbanua | <a href="mailto:jpvm@mac.com">jpvm@mac.com</a>                              |
| 18 | Benjamin Umans      | <a href="mailto:umans@fas.harvard.edu">umans@fas.harvard.edu</a>            |
| 19 | Rosalyn Flower      | <a href="mailto:rosalyn.flower@crick.ac.uk">rosalyn.flower@crick.ac.uk</a>  |
| 20 | Siew Woh Choo       | <a href="mailto:csw1978@hotmail.com">csw1978@hotmail.com</a>                |
| 21 | Steven Russell      | <a href="mailto:sr120@cam.ac.uk">sr120@cam.ac.uk</a>                        |
| 22 | Robert White        | <a href="mailto:rw108@cam.ac.uk">rw108@cam.ac.uk</a> (corresponding author) |

23

24 Keywords: chromatin, insulator, architectural protein, histone modification,  
25 topologically associated domains, housekeeping genes

26

27

28 **Abstract**

29 **Background**

30 It is now well established that eukaryote genomes have a common  
31 architectural organization into topologically associated domains (TADs) and  
32 evidence is accumulating that this organization plays an important role in  
33 gene regulation. However, the mechanisms that partition the genome into  
34 TADs and the nature of domain boundaries are still poorly understood.

35 **Results**

36 We have investigated boundary regions in the *Drosophila* genome and find  
37 that they can be identified as domains of very low H3K27me3. The genome-  
38 wide H3K27me3 profile partitions into two states; very low H3K27me3  
39 identifies Depleted (D) domains that contain housekeeping genes and their  
40 regulators such as the histone acetyltransferase-containing NSL complex,  
41 whereas domains containing mid-to-high levels of H3K27me3 (Enriched or E  
42 domains) are associated with regulated genes, irrespective of whether they  
43 are active or inactive. The D domains correlate with the boundaries of TADs  
44 and are enriched in a subset of architectural proteins, particularly Chromator,  
45 BEAF-32, and Z4/Putzig. However, rather than being clustered at the borders  
46 of these domains, these proteins bind throughout the H3K27me3-depleted  
47 regions and are much more strongly associated with the transcription start  
48 sites of housekeeping genes than with the H3K27me3 domain boundaries.

49 **Conclusions**

50 We suggest that the D domain chromatin state, characterised by very low  
51 H3K27me3 and established by housekeeping gene regulators, acts to

52 separate topological domains thereby setting up the domain architecture of

53 the genome.

54

55

56

57

58

59

60

61

62

63

64

65

66

67

68

69

70

71

72

73

74

75

76

## 77 **Background**

78

79 Our understanding of genome architecture has advanced rapidly in recent  
80 years with major insights coming from three approaches; the characterisation  
81 of chromatin domains on the basis of their constituent histone marks and  
82 associated proteins [1–4], the use of proximity-dependent ligation (3C and  
83 derivatives) to define the topology of chromatin within the nucleus [5–9] and  
84 the genome-wide mapping of the binding sites of architectural proteins such  
85 as the Insulator component, CTCF [10–13]. The combination of these  
86 approaches provides a view of the domain organization of the genome with  
87 the partitioning of chromatin into topologically associated domains (TADs)  
88 linked to the epigenetic landscape of domains of chromatin state and  
89 organized by the activities of architectural proteins.

90

91 Although the organization of the genome into domains is well established, the  
92 processes that form domains and, in particular, the nature of domain  
93 boundaries remain unclear. Architectural proteins are enriched at chromatin  
94 state domain boundaries; for example CTCF is enriched at the boundaries of  
95 H3K27me3 domains [10,12–14]. Architectural proteins are also enriched at  
96 TAD boundaries. In vertebrates, the boundaries of megabase-scale TADs  
97 show enriched CTCF binding [5]. Subsequent higher resolution studies  
98 revealed a refined TAD map with a median TAD size of 185 kb and an  
99 association between orientated CTCF binding sites and TAD boundaries,  
100 indicating a link between CTCF-dependent chromatin loops and TAD domains  
101 [8,15]. In *Drosophila*, TAD boundaries are associated with a number of

102 architectural proteins, including several Insulator proteins such as CTCF,  
103 BEAF-32, CP190 and Insulator-related proteins such as Chromator (also  
104 known as Chriz) [9,11]. TAD boundaries are characterised by clusters of  
105 architectural protein occupancy and boundary strength correlates with the  
106 concentration of architectural protein binding [16]. In several systems,  
107 mutations affecting the binding sites of architectural proteins have been  
108 shown to lead to reorganization of the domain structure with consequences  
109 for gene regulation [17–19]. However, architectural protein binding is not the  
110 only genomic feature associated with TAD boundaries; other enriched  
111 features include gene density, chromatin accessibility, transcriptional activity  
112 and housekeeping genes [5,9,11]. This raises the question of whether the  
113 boundaries are simply interfaces between adjacent TADs or whether they are  
114 more complex “boundary regions” with inherent activities and whose  
115 chromatin structure may act to separate flanking TADs. An interesting  
116 property of TAD organization in the genome is that it appears to be highly  
117 consistent between different cell types [5,8]. Recent studies suggest that the  
118 localization of constitutively expressed housekeeping genes in the regions  
119 between TADs may provide a basis for a constant pattern of TADs if the  
120 constitutively transcribed inter-TAD regions act to demarcate TAD borders  
121 [20,21]. This suggestion also raises questions about the roles of “architectural  
122 proteins” such as CTCF, which is implicated in a wide variety of functions.  
123 Some appear to be architectural functions, such as its role as a component of  
124 Insulator complexes that block enhancer-promoter interaction providing a  
125 basis for the establishment of independent regulatory domains in the genome.  
126 On the other hand, a significant proportion of CTCF sites occur close to

127 promoters [22] and CTCF has been shown to promote enhancer-promoter  
128 interactions [23–25]. Similarly, the *Drosophila* insulator component BEAF-32  
129 predominantly binds close to transcription start sites (TSSs) and regulates  
130 gene expression [26], and the insulator component CP190 is strongly  
131 associated with actively transcribed genes [14]. Overall it is unclear whether  
132 the clusters of architectural proteins at TAD boundaries provide a  
133 straightforward architectural function, acting as barriers demarcating the  
134 borders of adjacent TADs, or whether these proteins may be more associated  
135 with transcriptional regulation of the genes within the boundary regions.

136

137 In this paper we present an investigation into boundary regions in the  
138 *Drosophila* genome. We find that they can be identified as domains of very  
139 low H3K27me3 levels. The genome-wide H3K27me3 profile partitions into two  
140 states; very low H3K27me3 identifies domains that are highly enriched in  
141 housekeeping genes whereas domains containing regulated genes,  
142 irrespective of whether they are active or inactive, contain mid-to-high levels  
143 of H3K27me3. The domains depleted in H3K27me3 correlate with the  
144 boundaries of TADs and are enriched in architectural proteins, particularly  
145 Chromator, BEAF-32 and Z4/Putzig. However, rather than being clustered at  
146 the borders of these domains, these proteins bind throughout the H3K27me3-  
147 depleted regions and are much more strongly associated with the TSSs of  
148 housekeeping genes than with H3K27me3 domain boundaries. We suggest  
149 that the primary function of these proteins is linked to the transcriptional  
150 regulation of housekeeping genes and that this activity sets up chromatin

151 regions that act to separate topological domains, thereby establishing the  
152 domain architecture of the genome.

153

## 154 **Results**

155

### 156 **H3K27me3 domains in development**

157

158 As part of an investigation into changes in the epigenetic landscape during  
159 *Drosophila* spermatogenesis, we characterised the profile of the repressive  
160 histone mark, H3K27me3, in chromatin from purified primary spermatocytes.  
161 The profile is strikingly different to profiles of H3K27me3 found with embryo  
162 chromatin. In the embryo data the prominent feature is the enrichment of  
163 H3K27me3 in domains containing target sites of Polycomb (Pc) silencing  
164 complexes whereas in primary spermatocyte chromatin H3K27me3 appears  
165 much more widespread (Fig. 1). Although Pc target domains still show the  
166 highest level of H3K27me3 in primary spermatocyte chromatin, much of the  
167 genome shows a moderate level of H3K27me3 and domains with a moderate  
168 level are clearly distinct from domains where H3K27me3 is very low or  
169 absent. Examining other H3K27me3 profiles provides support for a  
170 widespread H3K27me3 distribution, for example chromatin from the Kc167  
171 cell line shows significant H3K27me3 in regions matching the moderate  
172 domains in primary spermatocytes and also has corresponding regions of  
173 very low H3K27me3 (Fig. 1).

174

175 To associate levels of H3K27me3 with states of gene expression in primary  
176 spermatocytes, we examined the H3K27me3 levels at the TSSs of different  
177 gene classes. We find that the lowest levels of H3K27me3 are tightly  
178 associated with constitutively expressed (housekeeping) genes (Fig. 1b). In  
179 contrast, regulated genes, whether active or inactive, are associated with  
180 higher levels of H3K27me3. Induced genes active in primary spermatocytes  
181 (spermatogenesis genes) have moderate levels of H3K27me3, whereas  
182 inactive genes (not expressed in testis) and Pc targets are associated with  
183 higher H3K27me3 levels. In other cells it is also clear that significant levels of  
184 H3K27me3 are not only associated with canonical Pc target genes (Fig. 1b,c).  
185 A developmental time course indicates that whereas housekeeping genes are  
186 always associated with very little or no H3K27me3, the “moderate” class  
187 represented by regulated genes (spermatogenesis and not expressed in testis  
188 classes) shows increasing H3K27me3 levels. Whilst significantly higher than  
189 the housekeeping levels in all profiles, the “moderate” levels are relatively low  
190 early in development but then rise to become closer to the level associated  
191 with Pc-targets by the pupal stage (Fig. 1d). This suggests that, apart from the  
192 housekeeping genes, there is a general developmental increase in  
193 H3K27me3 levels outside Pc domains, emphasizing the difference between  
194 constitutively active housekeeping regions and the rest of the genome.

195

### 196 **H3K27me3 domains provide a binary partitioning of the genome**

197

198 Focusing on the domains with very little or no H3K27me3 we investigated  
199 their associated genomic features (Fig. 2). H3K27me2 exhibits a similar



200 profile to H3K27me3 with a widespread distribution that has been associated  
201 with a global repressive role [27], and we also observe domains of low signal  
202 corresponding to the low level domains of H3K27me3. H3K27me3 and  
203 H3K27me2 differ at canonical Pc-targets which show high levels of  
204 H3K27me3 but low levels of H3K27me2 [27]. The H3K27me3 low level  
205 domains also show a link to histone acetylation with a striking match to  
206 regions of Histone deacetylase 3 (HDAC3) binding and also a  
207 correspondence with regions enriched for MRG15 (a component of the Tip60  
208 Histone acetyl-transferase (HAT) complex, [28,29]), MBD-R2 (a component of  
209 the NSL complex which regulates housekeeping gene expression and is  
210 associated with the HAT Males absent on the first (MOF) [30–33] and also the  
211 H4K16ac modification, generated by MOF and regulated by HDAC3 [34,35].  
212  
213 Applying a Hidden Markov Model to the primary spermatocyte H3K27me3  
214 profile we partitioned the genome into two states, Depleted (D) and Enriched  
215 (E) domains (Fig. 2) to facilitate a quantitative analysis of genomic features  
216 associated with these regions. There are 1,795 D regions and 1,796 E regions  
217 encompassing 34% and 65% of the euchromatic genome respectively. The D  
218 regions contain 62% of TSSs and are strongly enriched in housekeeping  
219 genes: containing 95% of TSSs of genes in our housekeeping gene class. In  
220 contrast, regulated gene classes are associated with E domains. For  
221 example, genes whose expression is limited to only a few *Drosophila* cell lines  
222 are predominantly in E domains (Fig. 2d). In addition, 75% of embryo Pc  
223 targets and 80% of genes specifically activated in spermatocytes are in E  
224 domains. Using the five chromatin state classification from Filion et al. [1], we

225 find that D regions are also enriched in active chromatin states, particularly  
226 YELLOW which has previously been associated with housekeeping genes  
227 and the Non-Specific Lethal (NSL) complex [32]. While the D regions are  
228 depleted in the H3K27me3 and H3K27me2 repressive histone marks, they  
229 are enriched for a variety of active marks including H3K4me3, H3K9ac,  
230 H3K27ac, H3K36me3 and H4K16ac. Binding of the HAT associated proteins  
231 MBD-R2 and MRG15 is enriched in D regions along with HDAC1 and HDAC3.  
232 Overall, the distinctive features of D and E domains support the potential  
233 functional relevance of this binary partitioning of the genome.

234

### 235 **D and E domains and genome architecture**

236 To explore the relationship between the organization of D and E domains and  
237 the overall domain architecture of the genome, we generated a high resolution  
238 interaction map of the Kc167 cell genome using HiC [6,36] with fragmentation  
239 using the 4-base cutter DpnII. As in previous studies, the interaction map  
240 shows the organization of the genome into a series of TADs allowing the  
241 derivation of a set of TAD boundaries across the genome. The TAD  
242 boundaries show a striking coincidence with D/E domain boundaries with 78%  
243 of TAD boundaries occurring within one 10kb bin of a D/E boundary (Fig. 3). A  
244 similar correspondence is also found with the TAD boundaries defined in  
245 embryo chromatin [9]. Comparing the interaction map with the organization of  
246 the genome into D and E domains reveals a clear connection, with the  
247 prominent interaction-dense TADs generally corresponding to E domains and  
248 intervening regions corresponding to D domains (Fig. 3a, Fig. S1). This  
249 correspondence has implications for the interpretation of the overall TAD

250 architecture as it suggests that prominent TADs do not simply abut each other  
251 with a discrete boundary at the junction. Rather, it suggests a model where  
252 neighbouring prominent TADs are separated from each other by an  
253 intervening region corresponding to a D domain (Fig. 3c).

254

### 255 **D domains are rich in a subset of insulator components**

256 The boundaries between TADs are enriched in insulator protein binding; this  
257 is seen for CTCF in vertebrates [5,8,15] and for a number of insulator  
258 components in *Drosophila* [9,11,13,16]. We analysed insulator component  
259 binding in D domains, using published profiles (Fig. 4). We find a strong  
260 association between the binding of the insulator protein BEAF-32 and D  
261 domains, with 86% of BEAF-32 binding sites mapping to D domains. BEAF-32  
262 binding is known to be largely overlapping with the insulator-related protein  
263 Chromator [37], the factor most strongly associated with TAD boundaries in  
264 embryo chromatin [9] and which directly interacts with BEAF-32 to form a  
265 complex that recruits CP190 [37]. We find Chromator is also strongly enriched  
266 in D domains, with 88% of sites mapping to D regions. Chromator forms a  
267 complex with Z4/Putzig that recruits the JIL-1 kinase to promote H3S10  
268 phosphorylation [38,39] and we find Z4/Putzig binding almost entirely confined  
269 to D domains with 96% of sites mapping to D regions. Whilst BEAF-32,  
270 Chromator and Z4/Putzig form a strongly D-associated group, the insulator  
271 component CP190, which is recruited to chromatin by several distinct DNA-  
272 binding insulator proteins including BEAF-32, CTCF and Su(Hw), is more  
273 widely distributed with only 66% of binding sites in D regions. As over 70% of  
274 CP190 sites within D regions overlap with BEAF-32 binding, this suggests that

275 the CP190 in D domains is specifically recruited into BEAF-32 insulator  
276 complexes. The insulator components GAF and CTCF are also widely  
277 distributed and lack a strong association with D domains. The Su(Hw)  
278 insulator protein has a distinct distribution, being relatively depleted from D  
279 domains, with only 26% of sites in D regions.

280

281 Although insulators have previously been associated with the borders of  
282 chromatin state domains, it is striking that the D domain-associated  
283 components BEAF-32, Chromator and Z4/Putzig are distributed quite evenly  
284 across D regions rather than being concentrated at the D/E boundaries (Fig.  
285 4c and d). This argues against the idea that insulator complexes are simply  
286 positioned at the boundaries of chromatin state domains.

287

288 As several *Drosophila* insulator proteins have previously been shown to be  
289 enriched at promoters, we examined the association between architectural  
290 protein binding and housekeeping gene TSSs. BEAF-32, Chromator, CP190  
291 and Z4/Putzig all show strong enrichment at housekeeping TSSs. Comparing  
292 the enrichments at housekeeping TSSs versus D/E borders we find much  
293 more enrichment at TSSs than borders. CTCF shows less strong enrichment  
294 at housekeeping TSSs, but interestingly it is still more strongly enriched at  
295 housekeeping TSSs than at D/E domain borders (Fig. 4e).

296

### 297 **D and E domains are topologically distinct**

298 As noted above, the E regions generally correspond to prominent TADs, i.e.  
299 regions of enhanced interaction with widespread interactions across the

300 domains (Fig. 3). In contrast, D domains, even if they are long, have a  
301 different appearance in the interaction map with less prominent long-range  
302 interactions (Fig. 5). This difference is evident in a plot of short-range (5-50kb)  
303 versus long-range (50–500kb) interactions where the D domains correspond  
304 to regions with high short-range versus long-range interaction ratios.  
305 Accumulating the interaction length data across the genome, we find that D  
306 and E domains have significantly different profiles (Fig. 5b) with D domains  
307 associated predominantly with short-range interactions and a more rapid fall  
308 in interaction density with increasing interaction length.

309

### 310 **Interaction of D domains**

311 In the genomic interaction maps there is evidence for interaction between D  
312 regions. This is seen as areas of enhanced interaction that sit on top of E  
313 TADs, corresponding to interaction between the two D domains that flank the  
314 E TAD (Figs. 1 and 6). Although they are not present at all E domains, such  
315 D-D interaction regions are frequently observed. For example, if we take the  
316 174 E domains of 60kb or above that are flanked on both sides by D domains,  
317 we find that 61 (35%) are associated with D-D interaction regions that contain  
318 more than 1.1-fold higher interaction density in the D-D region compared to  
319 neighbouring bins. A further feature of the interaction map, exemplified in Fig.  
320 6, is that E domain TADs are frequently flanked by a zone of relatively  
321 reduced interaction, corresponding to the zone of D-E interactions. The  
322 relative lack of interaction in this zone compared to neighbouring E-E and D-D  
323 interaction zones suggests that, whilst nearby homologous regions interact,

324 there is less heterologous (D-E) interaction suggesting spatial segregation of  
325 D and E regions in the nucleus.

326

## 327 **Discussion**

328

329 In this paper we propose a fundamental binary partitioning of the genome  
330 based on chromatin state. We identify two domain states based on the level of  
331 H3K27me3: Depleted or D domains having little or no H3K27me3 and  
332 Enriched or E domains with significant levels of H3K27me3. These two  
333 domain states differ markedly in their genomic features. In particular, the D  
334 domains are enriched in housekeeping gene TSSs, in regulators of  
335 housekeeping genes such as the histone acetyltransferase-containing NSL  
336 complex and in a subset of insulator and insulator-related components  
337 including BEAF-32, Chromator and Z4/Putzig. In contrast, the E domains are  
338 enriched in tissue-specific genes suggesting that the D/E divide may  
339 represent a binary subdivision between the constitutive and regulated  
340 genome. The organization of D and E domains is strongly associated with the  
341 topological architecture of the genome, supporting the idea that the constant  
342 TAD organization identified in several studies may be based on prominent  
343 TADs being flanked by domains enriched in constitutive gene expression. The  
344 prominent TADs correspond to E domains and are flanked by D domains rich  
345 in housekeeping genes. This proposed binary subdivision on the basis of D  
346 and E domains is likely to be related to the long-observed binary subdivision  
347 of the *Drosophila* genome based on the banding pattern of polytene  
348 chromosomes with D domains, rich in inter-band-specific proteins such as

349 Chromator, Z4/Putzig and MRG15, representing inter-bands and E domains  
350 representing chromosomal bands.

351

352 Although we propose a constant partitioning of the genome based on the  
353 H3K27me3 profile, the level of H3K27me3 in the E domains is dynamic. Early  
354 in development H3K27me3 is focused on Pc target genes, whereas later in  
355 development H3K27me3 is at moderate/high levels throughout E domains  
356 and this is particularly apparent in the profile from purified germline cells from  
357 the adult testis. Increased spreading of the H3K27me3 mark during  
358 development has been noted in mammalian genomes [40]. There is also a  
359 clear relationship between the widespread H3K27me3 we observe later in  
360 development and the profile of H3K27me2, which shows pervasive binding in  
361 E domains (except for Pc target regions) [27]. Inhibition of PRC2 histone  
362 methylase leads to loss of both H3K27me2 and me3 and is accompanied by a  
363 widespread increase in transcriptional activity not just at Pc target genes [27].  
364 Pervasive H3K27me2 is proposed to be governed by opposing roaming  
365 activities of PRC2 and the UTX demethylase complexes. This mechanism,  
366 together with an active role in widespread gene repression, may also apply to  
367 the H3K27me3 in E domains.

368

369 The striking correspondence of the D domains, defined by chromatin state,  
370 with the regions flanking prominent TADs suggests that the genomic  
371 distribution of chromatin state domains may have a key role in establishing  
372 the genome interaction architecture. What are the features of D domains that  
373 could enable them to function as boundary regions or inter-TADs? Although

374 very low levels of H3K27me3 define D domains, this histone mark seems  
375 unlikely to be the key functional property since it is dynamic, in contrast to the  
376 TAD organization, which appears to be constant. The chromatin state  
377 characteristics of D domains include little or no H3K27me2 and enrichment for  
378 active marks such as H3K36me3 and H4K16ac. The major enzyme  
379 responsible for acetylation of H4K16 is MOF [35], a component of the NSL  
380 complex that regulates housekeeping genes [31,32] and D domains are  
381 enriched in the NSL component MBD-R2. H4K16ac is a candidate for a  
382 modification with an effect on genome architecture as it has been  
383 demonstrated to affect chromatin structure [41]. It is interesting that HAT  
384 complexes and HDACs (particularly HDAC3 which targets H4K16ac [34]) are  
385 both enriched in D domains, however both are associated with gene  
386 expression in a mechanism whereby the H3K36me3 mark, linked with  
387 elongating PolIII, recruits HDACs to inhibit inappropriate initiation within active  
388 transcription units [42–44]. A further modification that may be relevant to an  
389 architectural role of D domains is H3S10 phosphorylation mediated by JIL-1  
390 kinase, which is recruited to polytene chromosome interband regions by a  
391 complex containing Chromator and Z4/Putzig [39]. Mutations in JIL-1 kinase,  
392 Chromator and Z4/Putzig all result in disruption to polytene chromosome  
393 structure [38,39,45–47]. Overall, we envisage that housekeeping transcription  
394 factors and a subset of insulator components recruit chromatin modification  
395 complexes leading to the establishment of the D chromatin state. The  
396 observed TAD organization could be dependent on the different properties of  
397 the D and E chromatin states. As suggested and modelled by Ulianov et al.  
398 [21], TAD organization can be generated based on two domain states with



399 differing chromatin aggregation properties. We have shown that D and E  
400 domains differ in their interaction properties (Fig. 5) with E domains showing a  
401 rather even high density of interactions across the domain, consistent with  
402 condensed chromatin, and D domains being characterised by shorter range  
403 interactions. Differential interaction properties are also supported by the  
404 observation of decreased interaction between neighbouring D and E regions  
405 and increased interaction between nearby D domains (Fig. 6), suggesting  
406 spatial segregation of the two domain states.

407

408 Insulator proteins have been proposed to be key mediators of both genome  
409 architecture and chromatin state domains. Our analysis has implications for  
410 insulator complex function since we do not find insulator protein binding to be  
411 strongly associated with the D/E chromatin state boundaries. The binding of a  
412 subset of insulator components is enriched in D domains but these  
413 components bind throughout the D domains and are strongly associated with  
414 the TSSs of housekeeping genes, not with domain boundaries. This suggests  
415 that insulator components, at least in the BEAF-32/Chromator/CP190 context,  
416 may be more directly associated with transcriptional regulation than with  
417 chromatin state boundary formation. BEAF-32 has been linked to transcription  
418 and in *BEAF-32* mutants many BEAF-32-associated genes show reduced  
419 expression [26]. In addition, Chromator acts as a transcriptional activator with  
420 specificity for housekeeping promoters [48]. We suggest that at least part of  
421 the contribution of BEAF-32, Chromator and CP190 to genome architecture  
422 may be indirect as they may act to establish the chromatin state in D domains,  
423 for example by recruiting chromatin modifiers such as JIL-1 kinase, enabling

424 D domains to act as boundary regions flanking TADs. As BEAF-  
425 32/Chromator/CP190 complexes mediate DNA interactions [37] and D  
426 domains are characterised by short-range looping, the insulator complexes  
427 may be mediating loop formation within D domains potentially forming  
428 promoter/promoter or promoter/enhancer contacts. The idea that insulator  
429 complexes within D domains are primarily involved with transcriptional  
430 regulation leaves open the question of what actually determines the location  
431 of the D/E boundaries. We speculate that the location of the chromatin state  
432 boundaries may be specified, not by insulator complexes precisely at the  
433 boundary, but by the range of action of chromatin modification complexes that  
434 are recruited to D domains by the insulator complexes and other transcription  
435 factors.

436

437 Despite a considerable body of evidence from studies on the mammalian  
438 genome linking the insulator protein CTCF with the domain organization of the  
439 genome, we find little association between CTCF binding and the D/E domain  
440 organization defined by H3K27me3 levels. Here our studies agree with  
441 Ulianov et al. [21], where HiC experiments on several *Drosophila* cell lines  
442 found that CTCF was only weakly enriched at regions separating TADs, and  
443 with Sexton et al. [9] who found in a genome-wide 3C analysis of embryo  
444 chromatin that Chromator is considerably more strongly associated with  
445 topological boundaries than CTCF. On the other hand, CTCF is clearly  
446 associated with domain architecture as it flanks Pc-regulated domains in Hox  
447 complexes [19,49,50] and mutating CTCF sites disrupts these domains [19].  
448 Sexton et al. [9] find that CTCF is preferentially associated with borders of Pc

449 domains. This suggests that, at least in *Drosophila*, CTCF may mediate the  
450 formation of a specialized set of domains distinct from the more general D/E  
451 domain organization of the genome.

452

## 453 **Conclusion**

454 We propose a binary partitioning of the genome based on chromatin state that  
455 provides a basis for the organization of chromatin into TADs and that reveals  
456 an architectural distinction between the organization of constitutive and  
457 regulated genes.

458

## 459 **Methods**

### 460 **ChIP-array on Primary Spermatocytes**

461 *Fly stocks:* For sorting YFP<sup>+</sup> primary spermatocytes, we used homozygous  
462 males of the YFP-tagged protein-trap line *heph*<sup>CPT1002406</sup> [51] which is  
463 homozygous fertile.

464 *Testis dissections, cell extraction and fixation:* Testes were dissected in ice-  
465 cold Schneider's medium (supplemented with 10% fetal calf serum) and  
466 incubated with collagenase (5 mg ml<sup>-1</sup>, Sigma-Aldrich C8051) plus protease  
467 inhibitors (Sigma-Aldrich P8340) in medium for 5 min at room temperature.  
468 After washing in medium, cells were extracted by gently pipetting for 5 min in  
469 100 µl medium, using a P200 tip (Rainin RT-200F; with 1.5 mm of the tip cut  
470 off to increase the diameter of the opening) and fixed by adding an equal  
471 volume of 2% formaldehyde (Sigma-Aldrich F8775) in PBS. Cells were mixed  
472 thoroughly and incubated for 10 min at 23°C in an Eppendorf Thermomixer at  
473 700 rpm. Fixation was stopped by adding 400 µl ice-cold medium and placing

474 the sample on ice. The sample was centrifuged in a swing-out rotor at 1,000 *g*  
475 for 5 min at 4°C and the pellet snap frozen in liquid N<sub>2</sub> prior to storage at  
476 –80°C. A total of 1,000 testes were dissected for each ChIP-array replicate.  
477 Testes were dissected in batches of 100 and, for each batch, the time from  
478 the start of dissection until fixation was approximately 1 hr.

479 *FACS*: Aliquots of extracted cells stored at –80°C were thawed, combined in  
480 PBS/0.01% Triton X-100 and passed through a 50 µm filter (Partec 04-004-  
481 2327). Cells were sorted using a 100 µm nozzle on a MoFlo FACS machine  
482 (Beckman Coulter) equipped with a 488 nm argon laser (100 mW). Cells were  
483 sorted into a microfuge tube containing 700 µl PBS/0.01% Triton X-100.  
484 Events were triggered on forward scatter and YFP<sup>+</sup> events were sorted using  
485 the gating strategy described in Fig. S2. Data was acquired and analysed  
486 using Summit software (Beckman Coulter).

487 *ChIP on sorted cells*: Sorted cells were centrifuged in a swing-out rotor at  
488 4,000 *g* for 15 min at 4°C, transferred to a thin-walled 0.5 ml microfuge tube  
489 (Axygen PCR-05-C), re-centrifuged and then resuspended in 130 µl Lysis  
490 Buffer (17 mM Tris.HCl (pH 8), 3.4 mM EDTA.Na<sub>2</sub>, 0.34% SDS) containing  
491 protease inhibitors (Sigma-Aldrich P8340). The lysate was sonicated for 5  
492 cycles at high setting using a Diagenode Bioruptor (1 cycle is 30 s ON and 30  
493 s OFF). After sonication, the sample was centrifuged at 16,000 *g* for 15 min at  
494 4°C, the chromatin-containing supernatant transferred to a fresh microfuge  
495 tube and 70 µl RIPA buffer (36.7 mM Tris.HCl (pH 8), 2.5 mM EDTA.Na<sub>2</sub>,  
496 0.01% SDS, 2.46% Triton X-100, 374 mM NaCl) containing protease  
497 inhibitors added to the chromatin sample. The ChIP reaction, washes and  
498 DNA purification were performed as in Dahl and Collas [52,53]. In brief,

499 magnetic beads were coated with 2.4 µg of rabbit anti-H3K27me3 antibody  
500 (Millipore 07-449) and incubated overnight in a volume of 100 µl with  
501 chromatin from ~100,000 YFP<sup>+</sup> sorted cells. Beads were washed, chromatin  
502 eluted, RNA and proteins digested, the DNA purified by phenol/chloroform  
503 extraction followed by ethanol precipitation using linear acrylamide as carrier  
504 and resuspended in 10 µl PCR grade water. Approximately 5 µl of chromatin  
505 was retained as input and purified alongside the ChIP sample.

506 *Amplification and labelling of ChIP DNA:* ChIP and input DNA were amplified  
507 using the GenomePlex Single Cell Whole Genome Amplification Kit (Sigma-  
508 Aldrich WGA4) following the manufacturer's instructions from the library  
509 preparation stage. Approximately 150 pg of DNA was used for amplification.  
510 Samples were amplified for 22 cycles and amplified DNA was purified using a  
511 QIAquick PCR Purification Kit (Qiagen). The amplified ChIP and input DNA (2  
512 µg each) were labelled with Cy5 and Cy3 using the BioPrime DNA Labeling  
513 Kit (Invitrogen) in the presence of Cy3- or Cy5-dCTP (GE Healthcare) and  
514 hybridised onto Nimblegen ChIP-chip 2.1M Whole-Genome Tiling Arrays  
515 according to the manufacturer's instructions.

516 *Microarray data processing:* We performed two biological replicates with a  
517 Cy3/Cy5 dye swap. Input chromatin was used as the reference to determine  
518 ChIP enrichment. Arrays were scanned and the images processed using  
519 NimbleScan software to generate raw data (\*.pair) files for each channel.  
520 Loess spatial correction was performed using the NimbleScan software and  
521 an in-house R script was used to generate normalised log<sub>2</sub> ChIP/input ratio  
522 (\*.sgr) files. For each array the median intensity per channel was scaled to  
523 500 then quantile normalisation was performed across all channels. The

524 normalised ratio scores for both arrays were averaged then smoothed by  
525 computing the mean score per 1 kb tiling window. The resulting \*.bedgraph  
526 file was visually examined using the Integrated Genome Browser [54].

## 527 **HiC**

528 HiC protocol was based on the methods described in [6,36,55].

529 *Cell Collection:* Kc167 cells (obtained from the *Drosophila* Genomics

530 Resource Center) were cultured in 10cm Petri plates in Schneider's medium

531 supplemented with 5% fetal calf serum and antibiotics at 25°C. Cells from 6

532 plates were harvested into sterile 50 ml centrifuge tubes. The cells were

533 collected by centrifugation at 1,200 rpm for 5 min at 4°C then re-suspended in

534 10 ml fresh medium and the cell concentration determined using a

535 haemocytometer.  $1 \times 10^8$  cells were resuspended to a total volume of 45 ml in

536 fresh medium, fixed by the addition of 1.25 ml 37% formaldehyde solution and

537 incubated with gentle shaking on a platform shaker at room temperature for

538 10 min. The reaction was stopped by adding 2.5 ml 2.5M glycine and further

539 incubation at room temperature for 5 min followed by 15 min on ice. The

540 cross-linked cells were divided into 4 x 15 ml falcon tubes (~12.3 ml per tube)

541 and collected by centrifugation at 1,500 rpm for 10 min at 4°C. The

542 supernatant was discarded and the fixed cells were flash frozen in liquid N<sub>2</sub>

543 then stored at -80°C.

544 *Restriction enzyme digestion:* Cells were thawed on ice (~ $2.0 \times 10^7$  cells) and

545 500 µl of lysis buffer (10 mM Tris-Cl, pH 8.0; 10 mM NaCl, 0.2% Igepal

546 CA360) and 50 µl of protease inhibitor cocktail (Sigma) were added. Cells

547 were lysed with 15 strokes of a Dounce homogeniser using the tight pestle

548 (Pestle A). The cell suspension was transferred to a microcentrifuge tube and

549 centrifuged at 5,000 rpm at room temperature for 5 min. The supernatant was  
550 discarded, the pellet washed twice with 0.5 ml of ice-cold 1.20x NEBuffer 3  
551 (5,000 rpm, 5 min at room temperature) and the pellet resuspended in 500  $\mu$ l  
552 of ice-cold 1.20x NEBuffer 3. 7.5  $\mu$ l of 20% SDS was added and the sample  
553 incubated at 37°C with shaking at 900 rpm for 1h, 50  $\mu$ l of 20% Triton X-100  
554 was added and incubation continued at 37°C, 900 rpm for 1h. A 50  $\mu$ l aliquot  
555 was taken and stored at -20 °C to serve as undigested control. 45  $\mu$ l of 1.20x  
556 NEBuffer 3 was then added to the remaining lysate followed by 400 U (8  $\mu$ l) of  
557 50U/ $\mu$ l DpnII and the digestion reaction was incubated at 37°C with shaking at  
558 900 rpm overnight.

559 *Blunt ending fragments with Klenow enzyme:* The restriction enzyme reaction  
560 was incubated at 65°C for 20 min to inactivate DpnII, then dispensed into five  
561 100 $\mu$ l aliquots in fresh microfuge tubes. Tube 1 was designated as a 3C  
562 control and Tubes 2-5 were used as Hi-C samples. To the Hi-C samples 0.35  
563  $\mu$ l each of 10 mM dCTP, dGTP and dTTP, 8.75  $\mu$ l of 0.4 mM biotin-14-dATP  
564 and 5  $\mu$ l of 5U/ $\mu$ l Klenow enzyme (NEB M210S) were added followed by  
565 incubation at 37°C for 45 min.

566 *Ligation:* 200  $\mu$ l of 10 mM Tris-HCl/1% SDS was added to each blunt-ended  
567 reaction and the 3C control tube, followed by transfer to a fresh 50 ml tube  
568 containing 700  $\mu$ l 10x T4 DNA Ligase Buffer (NEB) and 5894  $\mu$ l molecular  
569 biology grade water. Then 106  $\mu$ l 20% Triton X-100 was added and the  
570 mixture incubated for 1 h at 37°C with gentle shaking. 10,000U of DNA ligase  
571 (NEB, M0202L) was added and then incubated for 18h at 16°C followed by 30  
572 min at room temperature.

573 *De-crosslinking and DNA purification:* 30  $\mu$ l of 10 mg/ml Proteinase K (300  $\mu$ g  
574 final) was added to the reaction and incubated at 65°C overnight. 10  $\mu$ l of 30  
575 mg/ml RNase A (Sigma) was added and the reaction was incubated at 37°C  
576 for 45 min. 7 ml phenol-chloroform-isoamyl alcohol (PCI) was added and  
577 mixed vigorously by vortexing. The mixture was transferred to a 50 ml Phase  
578 Lock Gel tube (5 Prime, 2302860) and centrifuged at 2,200 g for 15 min at  
579 room temperature. The aqueous phase was transferred to a fresh 50 ml tube  
580 and 7 ml of distilled water, 1.5 ml 3M NaAcetate pH 5.2, and 35 ml 100% ice-  
581 cold ethanol were added. The mixture was incubated at -80°C for 1 h then  
582 centrifuged at 2,200 g, 4°C, for 45 minutes. The pellet was washed with 10 ml  
583 70% ethanol, centrifuged at 2,200 g at 4°C for 15 min and the pellet dried at  
584 room temperature for 10-15 min. The pellet was then re-suspended in 150  $\mu$ l  
585 of 10 mM Tris-HCl pH 8.0 and allowed to dissolve overnight at 4°C. The  
586 purified DNA was then transferred to a microcentrifuge tube and stored at -  
587 20°C.

588 *Re-purification of DNA:* 150  $\mu$ l of 10 mM Tris-HCl pH 8.0 was added to the  
589 dissolved pellet followed by 300  $\mu$ l Phenol-Chloroform. These were then  
590 mixed and centrifuged at 13,200 rpm for 5 min at room temperature in a  
591 Phase Lock tube. Phenol-Chloroform extraction was then repeated on the  
592 aqueous phase and DNA was precipitated by adding 30  $\mu$ l 3M NaAcetate, pH  
593 5.2 and 2.5 volumes of ice-cold 100% ethanol. The mixture was incubated at -  
594 80°C for at least 45 min then centrifuged for 20 min at 13,200 rpm at 4°C. The  
595 pellet was washed with 0.5 ml of ice-cold 70% ethanol and air-dried briefly.  
596 The pellet was then resuspended in 25  $\mu$ l TLE Buffer (10 mM Tris-Cl pH 8.0,  
597 0.1 mM EDTA). The Hi-C DNA preparations were pooled into a single tube



598 and the concentration measured using a Qubit photometer.

599 *Removal of biotin from unligated ends and shearing of Hi-C DNA:* For every 5  
600 µg of Hi-C DNA preparation, the following were added: 1 µl 10 mg/ml BSA, 10  
601 µl 10X NEBuffer 2, 1 µl 10mM dGTP, 1.67 µl (5U) T4 DNA polymerase and  
602 water to a total volume of 100 µl. The mixture was incubated at 12°C for 2 hr  
603 and the reaction stopped by adding 2 µl 0.5 M EDTA pH 8.0. DNA was then  
604 purified by adding 1 volume of Phenol-Chloroform and centrifuging at 13,200  
605 rpm for 5 min at room temperature in a Phase Lock tube. The DNA in the  
606 aqueous phase was precipitated by adding 10 µl 3M NaAcetate, pH 5.2 and  
607 2.5 volumes ice-cold 100% ethanol. The mixture was incubated at -80°C for at  
608 least 30 min then centrifuged for 20 min at 13,200 rpm at 4°C. The pellet was  
609 washed with 0.5 ml of ice-cold 70% ethanol, then dissolved and pooled in a  
610 total volume of 100 µl of water. The Hi-C DNA preparation was sheared at  
611 4°C for 20 min in 30 sec pulses at low setting using a Bioruptor sonicator  
612 (Diagenode).

613 *Library Preparation:* 1.5 µg sheared DNA was end repaired, poly-A tailed and  
614 adapters added using the TruSeq Kit (Illumina). The adapter ligated Hi-C  
615 library was run on a 1.5% agarose gel in 0.5X TBE at 50V for 2 h. The gel  
616 was stained with Sybr Gold and DNA fragments ~250 to 750 bp in size were  
617 excised and purified using a Qiagen Gel Extraction Kit. The DNA was eluted  
618 with 50 µl of TLE buffer and the final volume adjusted to 300 µl with water.  
619 Biotin-tagged size-selected Hi-C DNA was purified using Dynabeads MyOne  
620 Streptavidin Beads (Invitrogen). 150 µl of resuspended beads were prepared  
621 according to the manufacturer's instructions. These were then re-suspended

622 in 300  $\mu$ l 2x Binding Buffer (10 mM Tris-HCl pH 8.0, 1 mM EDTA, 2 M NaCl)  
623 and combined with 300  $\mu$ l of repaired Hi-C DNA. The biotin-labelled Hi-C DNA  
624 was incubated with the streptavidin beads at room temperature for 15 min on  
625 a rotator. The beads were then washed in 400  $\mu$ l 1x Binding Buffer followed  
626 by a single wash with 100 $\mu$ l 1x ligase buffer. The beads were then re-  
627 suspended in 50 $\mu$ l 1x ligase buffer and submitted to the Eastern Sequence  
628 and Informatics Hub (EASIH, Cambridge) for library preparation and 76-bp  
629 paired-end sequencing on an Illumina GAIIx sequencer.

630

### 631 **HiC data and segments**

632 Paired-end HiC reads were aligned against *Drosophila* genome BDGB  
633 release 5 with HiCUP (v0.5.7) [56]. Read counts/filtering are given in Table  
634 S1. Interactions were binned at 10 kb resolution. Contact matrices were  
635 normalised using the GOTHIC\_1.6.0 R package [57]. HiC segments were  
636 identified from the normalised contact matrices using the HiCseg R package  
637 [58], with 10% of the lowest linear portion of log-likelihood segment borders  
638 removed.

639

### 640 **Gene Classes and H3K27me3 developmental profile**

641 Housekeeping genes (4,091 genes) were derived from FlyAtlas [59] selecting  
642 genes expressed in all tissues (4 present calls), spermatogenesis genes  
643 (1,428 genes) were from Chen et al. [60] (GEO accession GSE28728)  
644 selecting genes down-regulated 4-fold or more in *aly* mutant testes, not-  
645 expressed-in-testis (2,432 genes) were from FlyAtlas selecting genes with  
646 zero calls in testis and >4 positive calls across other tissues and

647 Polycomb\_target genes (359 genes) were from Kwong et al. [61]. Genome  
648 annotation was Flybase Release 5.57 and the “all” class includes all genes in  
649 the euchromatic genome (13,832 TSSs). Raw ChIP-chip files of H3K27me3 in  
650 *Drosophila* at different time points of development were downloaded from  
651 GEO GSE15423. The data was quantile normalised for each time point and  
652 average scores across replicates calculated. Median scores for all gene TSSs  
653 (+/- 500bp) were calculated for each developmental stage. For the relative  
654 distance analysis, the mean scores of housekeeping, Pc and  
655 spermatogenesis TSSs were calculated for each stage. The distance between  
656 housekeeping and Pc class means was set to 1 and the relative distance of  
657 the spermatogenesis class mean to the housekeeper mean was calculated.

658

#### 659 **H3K27me3 Hidden Markov Model (HMM)**

660 Normalised Spermatocyte H3K27me3 euchromatin oligo scores were binned  
661 at 1 kb resolution taking the mean score per bin. A HMM using normal  
662 distribution was fitted for two states using the RHmm R package [62] for each  
663 chromosome. This divided the data into D (depleted in H3K27me3) and E  
664 (enriched in H3K27me3) bins. Adjacent bins with the same HMM state were  
665 then combined into regions. Gaps in the genome for which there were no  
666 oligo probes were closed if the same state was present on both sides.

667

#### 668 **Binding data**

669 ChIP-chip .cel files were downloaded from ModENCODE [63] for Chromator  
670 (277), CTCF (908), GAF (2568) and Jil1 (3037) and processed with Ringo [64]  
671 using a half window of 300 bp, minProbes 8 and max gap 200 bp. Binding

672 regions were called using a False Discovery Rate (FDR) of 1%. ChIP-seq  
673 fastq data was downloaded from GEO for BEAF32 (GSM1535963), CP190  
674 (GSM1535980), Z4/Putzig (GSM1536022) [65] and Su(Hw) (GSM762839)  
675 [66]. Reads were mapped to *Drosophila* genome BDGB release 5 using  
676 Bowtie with -m 1 option. ChIP-seq peaks were called with macs2 2.1.0  
677 (<https://github.com/taoliu/MACS>) [67] using unique tags and a q-value  
678 threshold of 1e-6 and otherwise the default parameters. Data sources are  
679 given in Table S2.

### 680 **Fraction of genes in class**

681 Gene expression score data for 25 *Drosophila* cell lines were downloaded  
682 from Supplemental Table S-3 of Cherbas et al. [68]. These gene scores  
683 derived from whole-genome tiling microarrays and represent the normalised  
684 maximum score for all exons included in that gene. Genes were assigned to D  
685 and E regions based on the location of the TSS. As suggested by Cherbas et  
686 al. we selected a threshold score of 300 to distinguish the expressed from  
687 unexpressed genes. For each gene we counted in how many cell lines it had  
688 an expression score > 300, and calculated the fractions of expressed genes in  
689 D and E.

690

### 691 **Interaction Fractions**

692 HiC interactions were binned at 5kb resolution and normalised using GOTHIC.  
693 Interactions for each 5 kb genomic bin up to 1 Mb distance were collected,  
694 excluding genomic coordinates located within 1 Mb of the chromosome ends.  
695 The sum of the interactions for each bin were set to 1 and fractions for close  
696 (5-50kb, thus ignoring interactions which are within 5kb of each other) and far

697 (50-500kb) calculated. Bins with no interactions and bins with extreme high  
698 interaction sum (> 97.5<sup>th</sup> percentile) were excluded. The ratio is given as  
699 fraction close/fraction far.

700

#### 701 **Declarations**

702 *Ethics approval and consent to participate*

703 n/a

704 *Consent for publication*

705 n/a

706 *Availability of data and material*

707 The datasets generated during and/or analysed during the current study are  
708 available at GEO (Accession number GSE85504)

709 *Competing interests*

710 The authors declare that they have no competing interests.

711 *Funding*

712 This work was supported by the Wellcome Trust (grant 089834/Z/09/Z), by the  
713 University of Malaya High Impact Research (grant  
714 UM.C/625/HIR/MOHE/CHAN-08) from the Ministry of Higher Education  
715 Malaysia, and by the BBSRC (grant BB/M007081/1). BU was funded by a  
716 Cambridge Marshall Scholarship.

717 *Authors' Contributions*

718 SE, JPM, SWC, SR and RW conceived and supervised experiments. SE and  
719 JPM performed the experiments. SE, BF, BU, RF and RW analysed data. SE,  
720 BF, JPM, SR and RW wrote the paper. All authors read and approved the  
721 final manuscript.

722 *Acknowledgements*

723 n/a

724 **Additional Files**

725 Additional File 1: Fig. S1. The comparison of Kc cell and embryo interaction  
726 maps. (PDF 1.2MB)

727 Additional File 2: Fig. S2. The purification of primary spermatocytes by FACS.  
728 (PDF 3.5MB)

729 Additional File 3: Table S1 HiC/HiCUP read counts and filtering. (XLSX 11KB)

730 Additional File 4: Table S2 Data sources. (XLSX 11KB)

731

732 **References**

733 1. Filion GJ, van Bommel JG, Braunschweig U, Talhout W, Kind J, Ward LD,  
734 et al. Systematic protein location mapping reveals five principal chromatin  
735 types in *Drosophila* cells. *Cell*. 2010;143:212–24.

736 2. Hoffman MM, Ernst J, Wilder SP, Kundaje A, Harris RS, Libbrecht M, et al.  
737 Integrative annotation of chromatin elements from ENCODE data. *Nucleic  
738 Acids Res*. 2012;gks1284.

739 3. Kharchenko PV, Alekseyenko AA, Schwartz YB, Minoda A, Riddle NC,  
740 Ernst J, et al. Comprehensive analysis of the chromatin landscape in  
741 *Drosophila melanogaster*. *Nature*. 2011;471:480–5.

742 4. Yip KY, Cheng C, Bhardwaj N, Brown JB, Leng J, Kundaje A, et al.  
743 Classification of human genomic regions based on experimentally determined  
744 binding sites of more than 100 transcription-related factors. *Genome Biol*.  
745 2012;13:R48.

746 5. Dixon JR, Selvaraj S, Yue F, Kim A, Li Y, Shen Y, et al. Topological  
747 domains in mammalian genomes identified by analysis of chromatin  
748 interactions. *Nature*. 2012;485:376–80.

749 6. Lieberman-Aiden E, van Berkum NL, Williams L, Imakaev M, Ragozcy T,  
750 Telling A, et al. Comprehensive mapping of long-range interactions reveals  
751 folding principles of the human genome. *Science*. 2009;326:289–93.

752 7. Nora EP, Lajoie BR, Schulz EG, Giorgetti L, Okamoto I, Servant N, et al.  
753 Spatial partitioning of the regulatory landscape of the X-inactivation centre.  
754 *Nature*. 2012;485:381–5.

- 755 8. Rao SSP, Huntley MH, Durand NC, Stamenova EK, Bochkov ID, Robinson  
756 JT, et al. A 3D map of the human genome at kilobase resolution reveals  
757 principles of chromatin looping. *Cell*. 2014;159:1665–80.
- 758 9. Sexton T, Yaffe E, Kenigsberg E, Bantignies F, Leblanc B, Hoichman M, et  
759 al. Three-dimensional folding and functional organization principles of the  
760 *Drosophila* genome. *Cell*. 2012;148:458–72.
- 761 10. Cuddapah S, Jothi R, Schones DE, Roh T-Y, Cui K, Zhao K. Global  
762 analysis of the insulator binding protein CTCF in chromatin barrier regions  
763 reveals demarcation of active and repressive domains. *Genome Res*.  
764 2009;19:24–32.
- 765 11. Hou C, Li L, Qin ZS, Corces VG. Gene density, transcription, and  
766 insulators contribute to the partition of the *Drosophila* genome into physical  
767 domains. *Mol. Cell*. 2012;48:471–84.
- 768 12. Nègre N, Brown CD, Shah PK, Kheradpour P, Morrison CA, Henikoff JG,  
769 et al. A comprehensive map of insulator elements for the *Drosophila* genome.  
770 *PLoS Genet*. 2010;6:e1000814.
- 771 13. Van Bortle K, Ramos E, Takenaka N, Yang J, Wahi JE, Corces VG.  
772 *Drosophila* CTCF tandemly aligns with other insulator proteins at the borders  
773 of H3K27me3 domains. *Genome Res*. 2012;22:2176–87.
- 774 14. Bartkuhn M, Straub T, Herold M, Herrmann M, Rathke C, Saumweber H,  
775 et al. Active promoters and insulators are marked by the centrosomal protein  
776 190. *Embo J*. 2009;28:877–88.
- 777 15. Gómez-Marín C, Tena JJ, Acemel RD, López-Mayorga M, Naranjo S,  
778 Calle-Mustienes E de la, et al. Evolutionary comparison reveals that diverging  
779 CTCF sites are signatures of ancestral topological associating domains  
780 borders. *Proc. Natl. Acad. Sci*. 2015;112:7542–7.
- 781 16. Van Bortle K, Nichols MH, Li L, Ong C-T, Takenaka N, Qin ZS, et al.  
782 Insulator function and topological domain border strength scale with  
783 architectural protein occupancy. *Genome Biol*. 2014;15:R82.
- 784 17. Guo Y, Xu Q, Canzio D, Shou J, Li J, Gorkin DU, et al. CRISPR Inversion  
785 of CTCF Sites Alters Genome Topology and Enhancer/Promoter Function.  
786 *Cell*. 2015;162:900–10.
- 787 18. Lupiáñez DG, Kraft K, Heinrich V, Krawitz P, Brancati F, Klopocki E, et al.  
788 Disruptions of topological chromatin domains cause pathogenic rewiring of  
789 gene-enhancer interactions. *Cell*. 2015;161:1012–25.
- 790 19. Narendra V, Rocha PP, An D, Raviram R, Skok JA, Mazzoni EO, et al.  
791 CTCF establishes discrete functional chromatin domains at the Hox clusters  
792 during differentiation. *Science*. 2015;347:1017–21.
- 793 20. Eagen KP, Hartl TA, Kornberg RD. Stable Chromosome Condensation  
794 Revealed by Chromosome Conformation Capture. *Cell*. 2015;163:934–46.

- 795 21. Ulianov SV, Khrameeva EE, Gavrilov AA, Flyamer IM, Kos P, Mikhaleva  
796 EA, et al. Active chromatin and transcription play a key role in chromosome  
797 partitioning into topologically associating domains. *Genome Res.*  
798 2015;gr.196006.115.
- 799 22. Kim TH, Abdullaev ZK, Smith AD, Ching KA, Loukinov DI, Green RD, et  
800 al. Analysis of the vertebrate insulator protein CTCF-binding sites in the  
801 human genome. *Cell.* 2007;128:1231–45.
- 802 23. Ing-Simmons E, Seitan VC, Faure AJ, Flicek P, Carroll T, Dekker J, et al.  
803 Spatial enhancer clustering and regulation of enhancer-proximal genes by  
804 cohesin. *Genome Res.* 2015;25:504–13.
- 805 24. Majumder P, Scharer CD, Choi NM, Boss JM. B cell differentiation is  
806 associated with reprogramming the CCCTC binding factor-dependent  
807 chromatin architecture of the murine MHC class II locus. *J. Immunol. Baltim.*  
808 *Md* 1950. 2014;192:3925–35.
- 809 25. Patel B, Kang Y, Cui K, Litt M, Riberio MSJ, Deng C, et al. Aberrant TAL1  
810 activation is mediated by an interchromosomal interaction in human T-cell  
811 acute lymphoblastic leukemia. *Leukemia.* 2014;28:349–61.
- 812 26. Jiang N, Emberly E, Cuvier O, Hart CM. Genome-wide mapping of  
813 boundary element-associated factor (BEAF) binding sites in *Drosophila*  
814 *melanogaster* links BEAF to transcription. *Mol Cell Biol.* 2009;29:3556–68.
- 815 27. Lee H-G, Kahn TG, Simcox A, Schwartz YB, Pirrotta V. Genome-wide  
816 activities of Polycomb complexes control pervasive transcription. *Genome*  
817 *Res.* 2015;25:1170–81.
- 818 28. Cai Y, Jin J, Tomomori-Sato C, Sato S, Sorokina I, Parmely TJ, et al.  
819 Identification of new subunits of the multiprotein mammalian TRRAP/TIP60-  
820 containing histone acetyltransferase complex. *J. Biol. Chem.*  
821 2003;278:42733–6.
- 822 29. Kusch T, Florens L, Macdonald WH, Swanson SK, Glaser RL, Yates JR,  
823 et al. Acetylation by Tip60 is required for selective histone variant exchange at  
824 DNA lesions. *Science.* 2004;306:2084–7.
- 825 30. Cai Y, Jin J, Swanson SK, Cole MD, Choi SH, Florens L, et al. Subunit  
826 composition and substrate specificity of a MOF-containing histone  
827 acetyltransferase distinct from the male-specific lethal (MSL) complex. *J. Biol.*  
828 *Chem.* 2010;285:4268–72.
- 829 31. Feller C, Prestel M, Hartmann H, Straub T, Söding J, Becker PB. The  
830 MOF-containing NSL complex associates globally with housekeeping genes,  
831 but activates only a defined subset. *Nucleic Acids Res.* 2012;40:1509–22.
- 832 32. Lam KC, Mühlpfordt F, Vaquerizas JM, Raja SJ, Holz H, Luscombe NM,  
833 et al. The NSL complex regulates housekeeping genes in *Drosophila*. *PLoS*  
834 *Genet.* 2012;8:e1002736.



- 835 33. Mendjan S, Taipale M, Kind J, Holz H, Gebhardt P, Schelder M, et al.  
836 Nuclear Pore Components Are Involved in the Transcriptional Regulation of  
837 Dosage Compensation in *Drosophila*. *Mol. Cell*. 2006;21:811–23.
- 838 34. Lv W-W, Wei H-M, Wang D-L, Ni J-Q, Sun F-L. Depletion of histone  
839 deacetylase 3 antagonizes PI3K-mediated overgrowth of *Drosophila* organs  
840 through the acetylation of histone H4 at lysine 16. *J. Cell Sci*. 2012;125:5369–  
841 78.
- 842 35. Smith ER, Pannuti A, Gu W, Steurnagel A, Cook RG, Allis CD, et al. The  
843 *drosophila* MSL complex acetylates histone H4 at lysine 16, a chromatin  
844 modification linked to dosage compensation. *Mol. Cell. Biol*. 2000;20:312–8.
- 845 36. van Berkum NL, Lieberman-Aiden E, Williams L, Imakaev M, Gnirke A,  
846 Mirny LA, et al. Hi-C: A Method to Study the Three-dimensional Architecture  
847 of Genomes. *J. Vis. Exp. JoVE* [Internet]. 2010 [cited 2016 Jul 6]; Available  
848 from: <http://www.ncbi.nlm.nih.gov/pmc/articles/PMC3149993/>
- 849 37. Vogelmann J, Gall AL, Dejardin S, Allemand F, Gamot A, Labesse G, et  
850 al. Chromatin Insulator Factors Involved in Long-Range DNA Interactions and  
851 Their Role in the Folding of the *Drosophila* Genome. *PLOS Genet*.  
852 2014;10:e1004544.
- 853 38. Eggert H, Gortchakov A, Saumweber H. Identification of the *Drosophila*  
854 interband-specific protein Z4 as a DNA-binding zinc-finger protein determining  
855 chromosomal structure. *J. Cell Sci*. 2004;117:4253–64.
- 856 39. Gan M, Moebus S, Eggert H, Saumweber H. The Chriz-Z4 complex  
857 recruits JIL-1 to polytene chromosomes, a requirement for interband-specific  
858 phosphorylation of H3S10. *J. Biosci*. 2011;36:425–38.
- 859 40. Hawkins RD, Hon GC, Lee LK, Ngo Q, Lister R, Pelizzola M, et al. Distinct  
860 epigenomic landscapes of pluripotent and lineage-committed human cells.  
861 *Cell Stem Cell*. 2010;6:479–91.
- 862 41. Shogren-Knaak M, Ishii H, Sun J-M, Pazin MJ, Davie JR, Peterson CL.  
863 Histone H4-K16 acetylation controls chromatin structure and protein  
864 interactions. *Science*. 2006;311:844–7.
- 865 42. Carrozza MJ, Li B, Florens L, Suganuma T, Swanson SK, Lee KK, et al.  
866 Histone H3 methylation by Set2 directs deacetylation of coding regions by  
867 Rpd3S to suppress spurious intragenic transcription. *Cell*. 2005;123:581–92.
- 868 43. Joshi AA, Struhl K. Eaf3 chromodomain interaction with methylated H3-  
869 K36 links histone deacetylation to Pol II elongation. *Mol. Cell*. 2005;20:971–8.
- 870 44. Keogh M-C, Kurdistani SK, Morris SA, Ahn SH, Podolny V, Collins SR, et  
871 al. Cotranscriptional set2 methylation of histone H3 lysine 36 recruits a  
872 repressive Rpd3 complex. *Cell*. 2005;123:593–605.

- 873 45. Deng H, Zhang W, Bao X, Martin JN, Girton J, Johansen J, et al. The JIL-  
874 1 kinase regulates the structure of *Drosophila* polytene chromosomes.  
875 *Chromosoma*. 2005;114:173–82.
- 876 46. Gortchakov AA, Eggert H, Gan M, Mattow J, Zhimulev IF, Saumweber H.  
877 Chriz, a chromodomain protein specific for the interbands of *Drosophila*  
878 *melanogaster* polytene chromosomes. *Chromosoma*. 2005;114:54–66.
- 879 47. Rath U, Ding Y, Deng H, Qi H, Bao X, Zhang W, et al. The chromodomain  
880 protein, Chromator, interacts with JIL-1 kinase and regulates the structure of  
881 *Drosophila* polytene chromosomes. *J. Cell Sci*. 2006;119:2332–41.
- 882 48. Stampfel G, Kazmar T, Frank O, Wienerroither S, Reiter F, Stark A.  
883 Transcriptional regulators form diverse groups with context-dependent  
884 regulatory functions. *Nature*. 2015;528:147–51.
- 885 49. Bowman SK, Deaton AM, Domingues H, Wang PI, Sadreyev RI, Kingston  
886 RE, et al. H3K27 modifications define segmental regulatory domains in the  
887 *Drosophila* bithorax complex. *eLife*. 2014;3:e02833.
- 888 50. Holohan EE, Kwong C, Adryan B, Bartkuhn M, Herold M, Renkawitz R, et  
889 al. CTCF genomic binding sites in *Drosophila* and the organisation of the  
890 bithorax complex. *PLoS Genet*. 2007;3:e112.
- 891 51. Lowe N, Rees JS, Roote J, Ryder E, Armean IM, Johnson G, et al.  
892 Analysis of the expression patterns, subcellular localisations and interaction  
893 partners of *Drosophila* proteins using a pigP protein trap library. *Dev. Camb.*  
894 *Engl*. 2014;141:3994–4005.
- 895 52. Dahl JA, Collas P. A rapid micro chromatin immunoprecipitation assay  
896 (microChIP). *Nat Protoc*. 2008;3:1032–45.
- 897 53. Dahl JA, Collas P. MicroChIP--a rapid micro chromatin  
898 immunoprecipitation assay for small cell samples and biopsies. *Nucleic Acids*  
899 *Res*. 2008;36:e15.
- 900 54. Nicol JW, Helt GA, Blanchard SG, Raja A, Loraine AE. The Integrated  
901 Genome Browser: free software for distribution and exploration of genome-  
902 scale datasets. *Bioinforma. Oxf. Engl*. 2009;25:2730–1.
- 903 55. Hagège H, Klous P, Braem C, Splinter E, Dekker J, Cathala G, et al.  
904 Quantitative analysis of chromosome conformation capture assays (3C-  
905 qPCR). *Nat. Protoc*. 2007;2:1722–33.
- 906 56. Wingett S, Ewels P, Furlan-Magaril M, Nagano T, Schoenfelder S, Fraser  
907 P, et al. HiCUP: pipeline for mapping and processing Hi-C data.  
908 *F1000Research*. 2015;4:1310.
- 909 57. Mifsud B, Sugar R. GOTHiC: Binomial test for Hi-C data analysis. 2013;R  
910 package version 1.6.0.

- 911 58. Lévy-Leduc C, Delattre M, Mary-Huard T, Robin S. Two-dimensional  
912 segmentation for analyzing Hi-C data. *Bioinformatics*. 2014;30:i386–92.
- 913 59. Chintapalli VR, Wang J, Dow JAT. Using FlyAtlas to identify better  
914 *Drosophila melanogaster* models of human disease. *Nat. Genet*.  
915 2007;39:715–20.
- 916 60. Chen X, Lu C, Prado JR, Eun SH, Fuller MT. Sequential changes at  
917 differentiation gene promoters as they become active in a stem cell lineage.  
918 *Development*. 2011;138:2441–50.
- 919 61. Kwong C, Adryan B, Bell I, Meadows L, Russell S, Manak JR, et al.  
920 Stability and dynamics of polycomb target sites in *Drosophila* development.  
921 *PLoS Genet*. 2008;4:e1000178.
- 922 62. Taramasco O, Bauer S. RHmm: Hidden Markov Models simulations and  
923 estimations. 2013;R package version 2.0.3.
- 924 63. ModENCODE. <http://www.modencode.org>.
- 925 64. Toedling J, Sklyar O, Huber W. Ringo – an R/Bioconductor package for  
926 analyzing ChIP-chip readouts. *BMC Bioinformatics*. 2007;8:221.
- 927 65. Li L, Lyu X, Hou C, Takenaka N, Nguyen HQ, Ong CT, et al. Widespread  
928 rearrangement of 3D chromatin organization underlies polycomb-mediated  
929 stress-induced silencing. *Mol Cell*. 2015;58:216–31.
- 930 66. Wood AM, Van Bortle K, Ramos E, Takenaka N, Rohrbaugh M, Jones  
931 BC, et al. Regulation of chromatin organization and inducible gene expression  
932 by a *Drosophila* insulator. *Mol. Cell*. 2011;44:29–38.
- 933 67. Zhang Y, Liu T, Meyer CA, Eeckhoute J, Johnson DS, Bernstein BE, et al.  
934 Model-based analysis of ChIP-Seq (MACS). *Genome Biol*. 2008;9:R137.
- 935 68. Cherbas L, Willingham A, Zhang D, Yang L, Zou Y, Eads BD, et al. The  
936 transcriptional diversity of 25 *Drosophila* cell lines. *Genome Res*.  
937 2011;21:301–14.
- 938 69. Sidiropoulos N, Sohi SH, Rapin N, Bagger FO. SinaPlot: an enhanced  
939 chart for simple and truthful representation of single observations over  
940 multiple classes [Internet]. 2015 Oct. Report No.: biorxiv;028191v1. Available  
941 from: <http://biorxiv.org/lookup/doi/10.1101/028191>

942

## 943 **Figure Legends**

### 944 **Fig. 1 Domains with very low H3K27me3**

- 945 (a) Binding profiles of H3K27me3 in primary spermatocytes compared to Kc  
946 cell and 0-12 hr embryo H3K27me3 profiles and Kc cell Polycomb profile.

947 Green bars indicate selected regions of very low H3K27me3 and red bars  
948 indicate selected Polycomb binding regions. See Table S2 for data sources.  
949 (b) SinaPlots [69] of H3K27me3 median binding scores at the TSSs (+/-  
950 500bp) of different gene classes: all = all genes in euchromatic genome, hk =  
951 housekeeping genes, Sp = spermatogenesis genes, nT = genes not  
952 expressed in testis, Pc = Polycomb targets from [61], see Methods for  
953 derivation of gene classes. Means are indicated by horizontal lines. (c) Scatter  
954 plot of H3K27me3 median binding scores at all TSSs (+/- 500bp) for pupae  
955 versus primary spermatocytes showing distinct clustering of the different gene  
956 classes. (d) Relative distance of the mean of the spermatogenesis gene class  
957 binding scores at TSSs, in reference to the hk mean as zero and the Pc mean  
958 as 1, at different developmental stages (E = Embryo, L1-3 = Larval instars, F  
959 = adult female and M = adult male), in cell lines (Kc and S2) and in primary  
960 spermatocytes (Sp). There is a trend of increasing H3K27me3 during  
961 development.

962

## 963 **Fig. 2 Genomic features of D domains**

964 (a) Profiles of selected histone modifications, chromatin components and  
965 housekeeping genes show association with the D domain HMM state (green  
966 bars) based on the H3K27me3 profile in primary spermatocytes. The  
967 H3K27me3 and H3K27me2 profiles both show low levels in the D domains  
968 but differ in the Pc target regions (red bars). (b) Stacked plots of scaled D  
969 domains (left) and E domains (right) showing enrichment of tiles containing  
970 housekeeping gene TSSs in D domains. D and E regions are split into 80  
971 equal sized tiles per region and extended on both sides by 10 tiles outside the

972 region. Red dotted lines show domain borders. (c) Using the 5-state colour-  
973 coded chromatin state classification of Filion et al. [1], the plot shows the  
974 different chromatin state proportions in D and E domains and the prevalence  
975 of the “yellow” state in D domains. (d) Using cell line gene expression data  
976 from Cherbas et al. [68], the plot shows that genes with narrow tissue  
977 expression are more prevalent in E domains (blue), whereas genes with  
978 broad expression are more prevalent in D domains (green). (e) Boxplots of  
979 ChIP scores for histone modifications across D (green) and E (blue) domains  
980 showing depletion of repressive chromatin modifications and enrichment of  
981 active chromatin modification in D domains. (f) Boxplots of ChIP scores for  
982 selected chromatin components showing enrichment in D domains. See Table  
983 S2 for data sources.

984

985 **Fig. 3 D domains are strongly associated with TAD architecture**

986 (a) Heatmap of 10kb binned normalised HiC interactions across a 2 Mb region  
987 of chromosome 2L in Kc cells showing the association of the D domain state  
988 and TAD architecture. Below the interaction heatmap the tracks are  
989 “H3K27me3” showing the H3K27me3 primary spermatocyte profile, “D”  
990 showing the D HMM-defined domains, “HiC” showing the TAD boundaries  
991 derived from the Kc cell HiC data and “State” showing the 5-colour chromatin  
992 state profile. (b) Histograms showing (from the left) the mapping of D domain  
993 borders to Kc HiC TAD boundaries (D to Kc TAD) and vice versa (Kc TAD to  
994 D), followed by the mapping of the D domains borders to the TAD boundaries  
995 identified in embryo chromatin by Sexton et al. [9] (D to Embryo TAD) and  
996 vice versa (Embryo TAD to D). (c) In contrast to model “a” where TADs abut

997 at simple interfaces, we suggest model “*b*” where prominent TADs (blue) are  
998 separated by boundary regions corresponding to D domains (green).

999

#### 1000 **Fig. 4 D domains and Insulators**

1001 (a) Binding profiles of insulator and insulator-related components showing that  
1002 a subset, Chromator, BEAF-32, Z4/Putzig and JIL-1, show a clear association  
1003 with D domains (green bars) whereas CTCF does not. All profiles are from Kc  
1004 cells, see Table S2 for data sources. (b) Percentages of TSSs, DNase1 sites,  
1005 insulator and insulator-related components mapping to D or E domains. (c)  
1006 Profiles of insulator/insulator-related components within a single D domain.  
1007 The binding sites of these components are spread throughout the domain and  
1008 show an association with TSSs and not with the domain boundaries. The  
1009 extent of the D domain is represented by the green bar, TSSs are indicated by  
1010 grey bars and genes in the housekeeping gene list are indicated by gold  
1011 asterisks. (d) Plots showing mapping of insulator/insulator-related  
1012 components to scaled D (green line) and E (blue line) domains. D and E  
1013 domains are split into 80 tiles per domain and extended on both sides by 10  
1014 tiles. The number of normalized binding summits were counted for each tile.  
1015 For normalisation, the summit counts were scaled by the number of summit  
1016 binding positions ( $n$ ) for each factor so that each summit count is  $1000/n$ . The  
1017 dotted vertical lines indicate the domain borders. For the TSS plot, “counts” is  
1018 the number of TSSs per tile. The binding locations are evenly spread  
1019 throughout D domains and not concentrated at the domain borders. For E  
1020 domains, the flanking peaks are likely due to the scaling causing compression  
1021 of large domains and a similar profile is seen with insulator/insulator-related

1022 and TSS mapping. (e) Accumulation plots focused on either TSSs or domain  
1023 borders. In the TSS plots the red line indicates housekeeping genes and the  
1024 grey line indicates non-housekeeping genes. The total summit counts for each  
1025 factor are scaled as in (d), normalised to correct for the different numbers of  
1026 TSSs and Borders and the final values scaled to give a range between 0-10.  
1027

1028 **Fig. 5 D and E domains are topologically distinct**

1029 (a) Kc Hi-C interaction heatmaps at selected D and E domains with tracks “D”  
1030 showing the D domain as green bars, “HiC” showing the derived TAD  
1031 boundaries and “State” showing the 5-colour chromatin state profile. Whilst  
1032 the E region TADs show rather uniform interaction across the whole domain,  
1033 in the D regions there is a prevalence of short interactions with high heatmap  
1034 intensity close to the baseline. (b) Interaction distance profile for D domains  
1035 (green line) and E domains (blue line) showing the preponderance of short  
1036 interactions in D domains. For both D and E regions longer than 30kb (D =  
1037 443 regions, E = 755 regions) the normalised HiC interaction counts (10kb  
1038 resolution) were collected into 10kb distance bins and the median per bin  
1039 calculated. The p-value was calculated using the Wilcox test of the medians  
1040 between D and E. (c) Profiles of interaction distance across a 5 Mb region on  
1041 Chromosome X (see Methods for details). D domains are indicated by green  
1042 bars. The “far” interaction (50-500kb) frequency dips in D domains (top  
1043 profile), whilst the “close” interaction (5-50kb) frequency peaks in D domains.  
1044 The bottom profile shows the ratio of “close”/“far” interactions.

1045

1046 **Fig. 6 Inter-domain interactions**

1047 (a) Kc Hi-C interaction heatmaps at selected D and E domains showing  
1048 evidence of interaction between D domains. The “D” track shows D domains  
1049 (green bars). (b) Schematic of interaction heatmap showing inter-domain  
1050 interactions. (c) Model of chromatin organization into D (green) and E (blue)  
1051 domains. The two domains types are represented with different chromatin  
1052 topologies with the E domains condensed and the D domains more open but  
1053 with defined short-range interactions mediated by insulator complexes (yellow  
1054 discs). D and E domains are represented as spatially segregated fitting the  
1055 observation of interaction between domains of the same type.



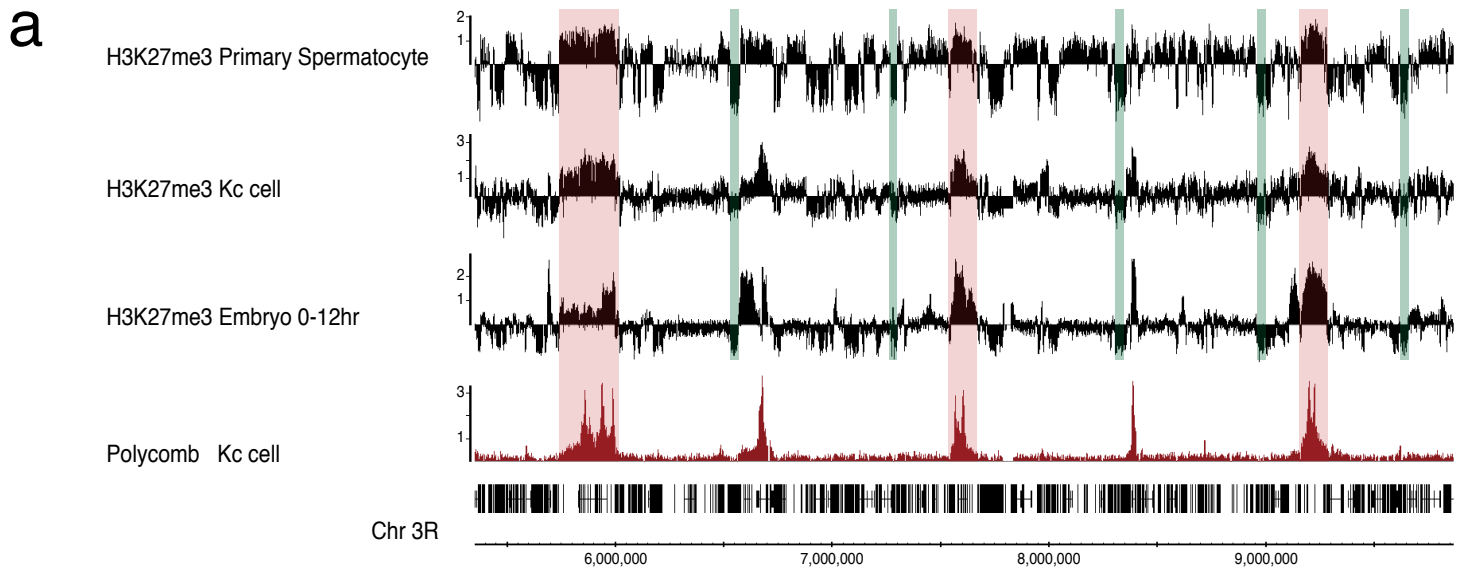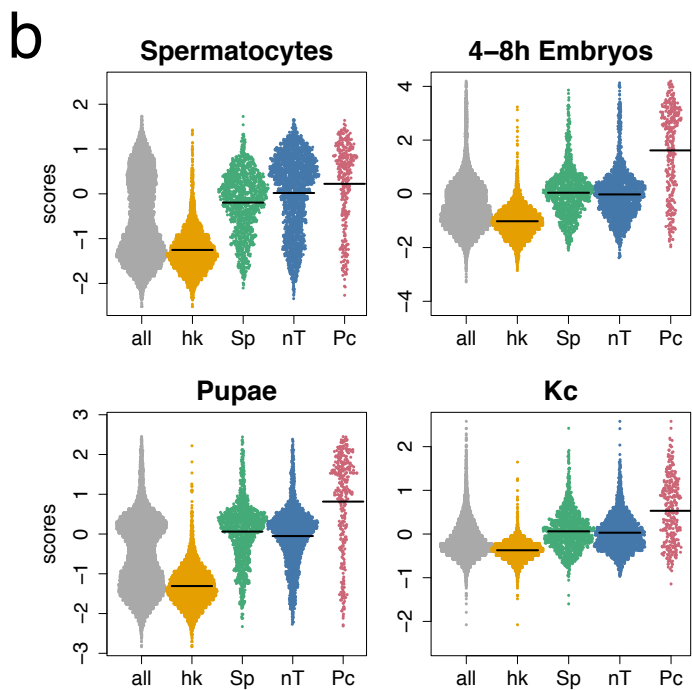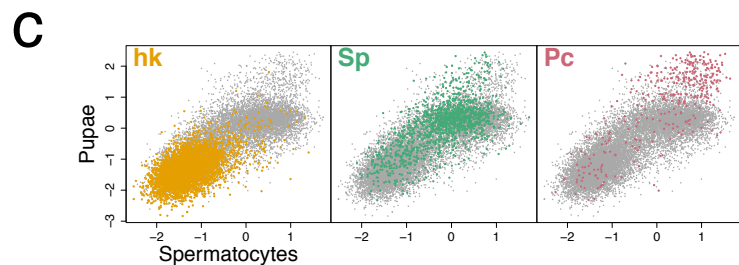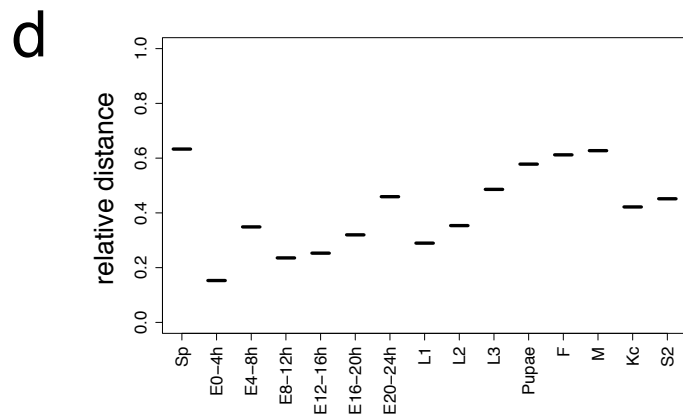

Figure 1

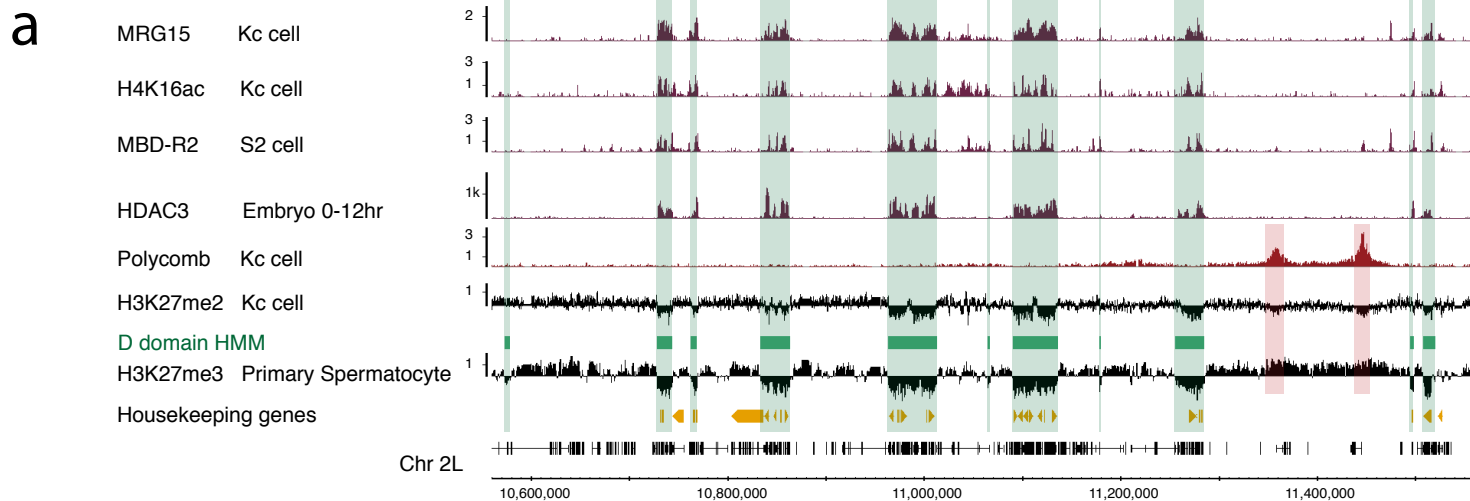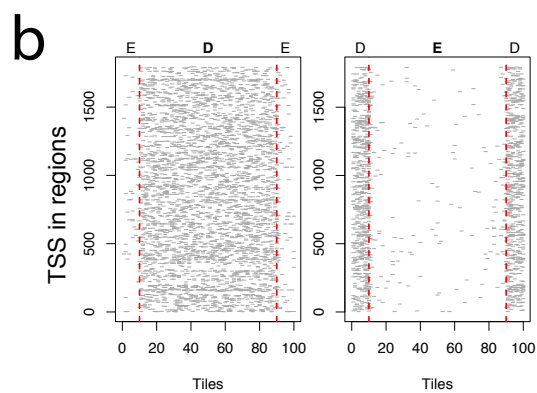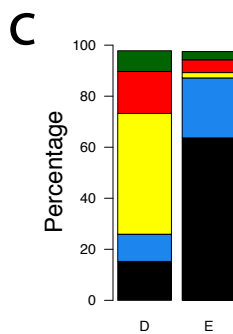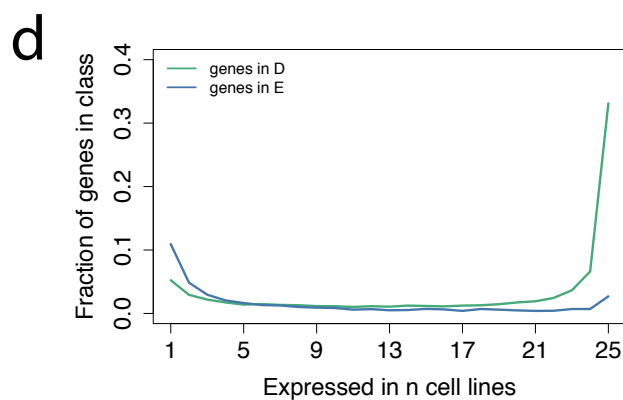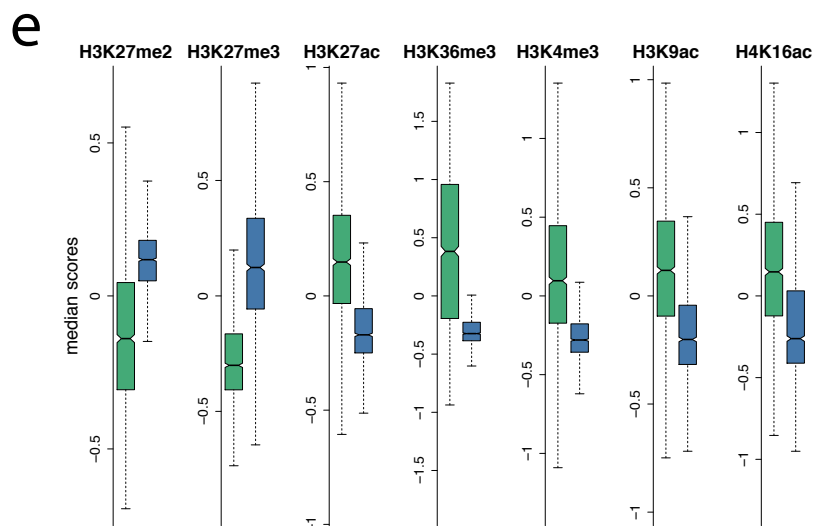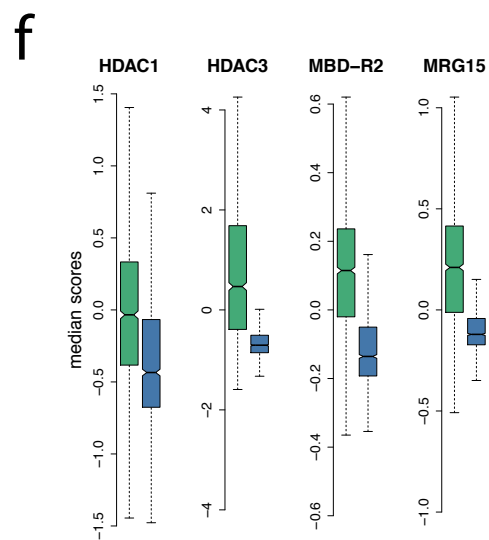

Figure 2

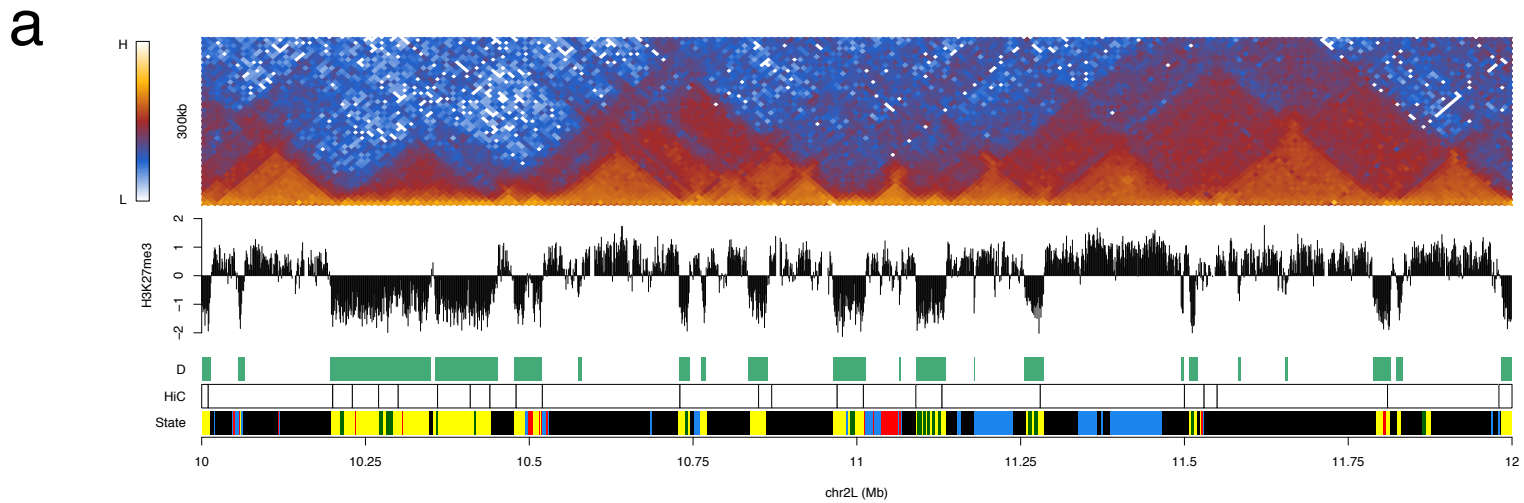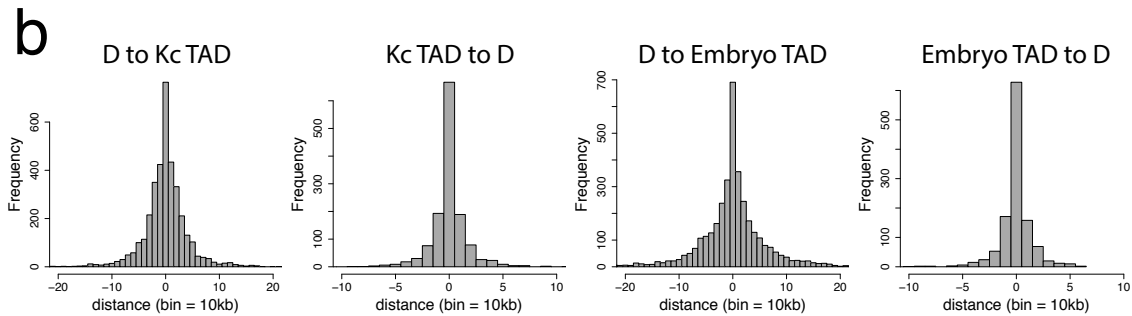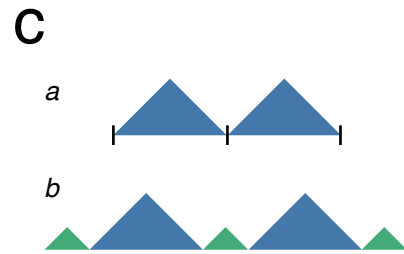

Figure 3

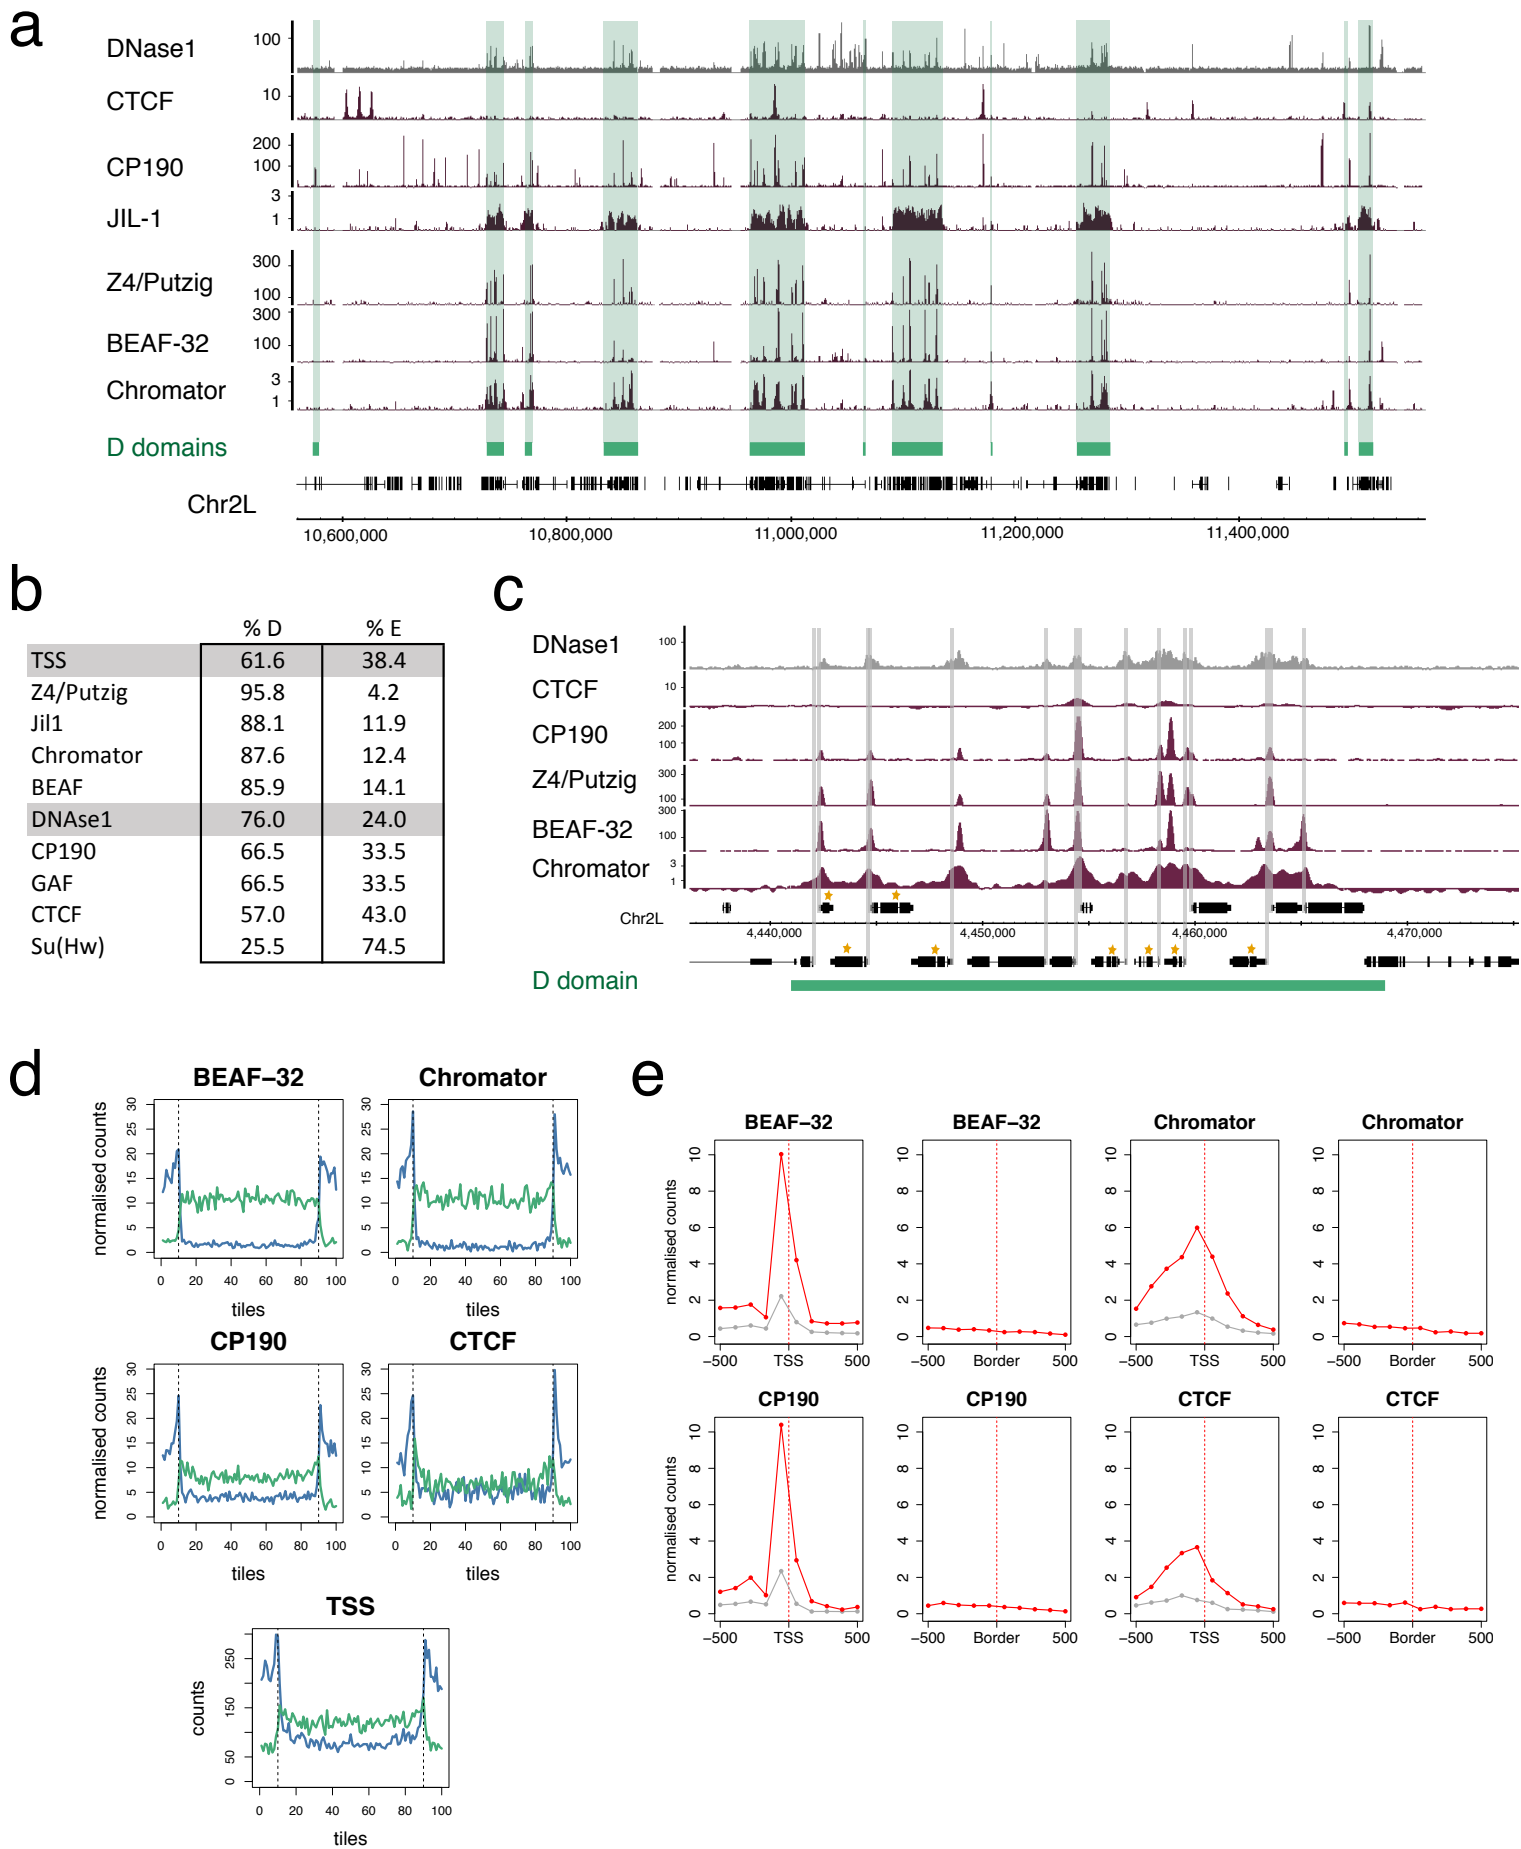

Figure 4

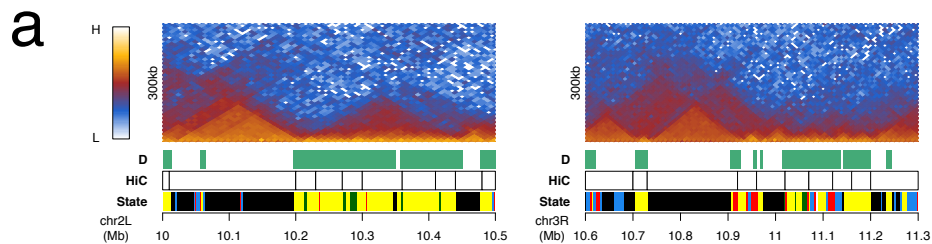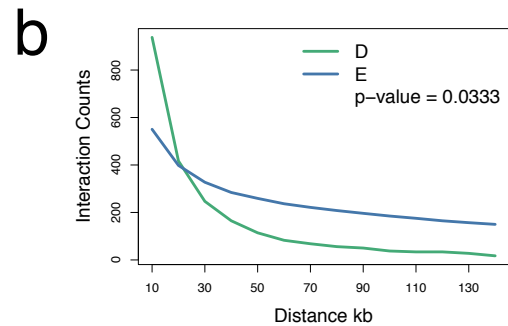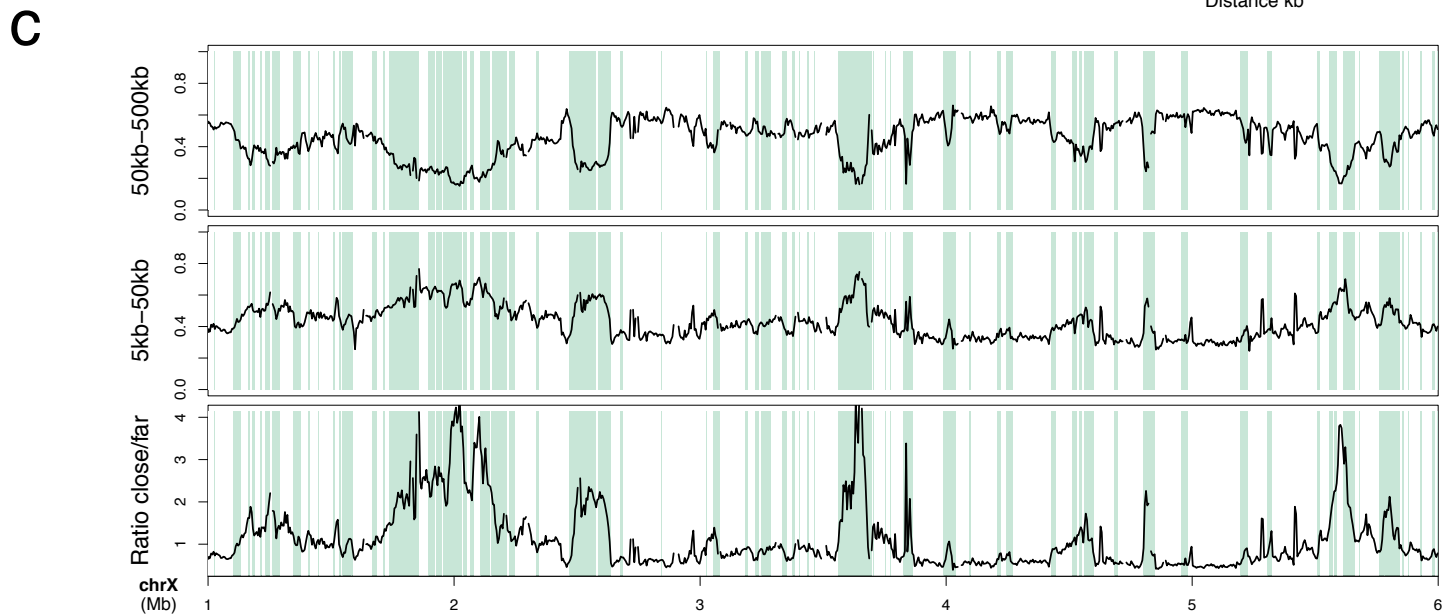

Figure 5

**a**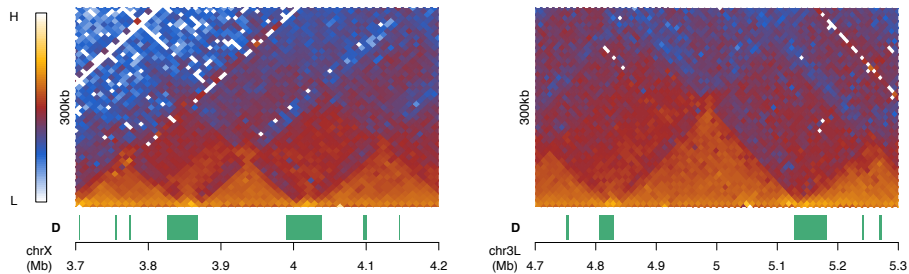**b**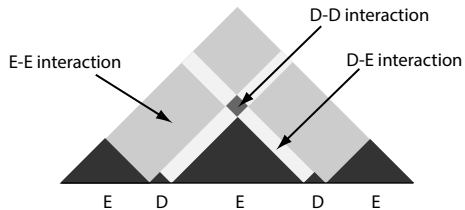**c**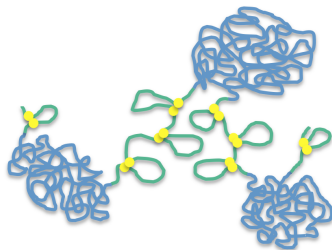**Figure 6**
